# Supplementary material for: Novel cesium cerium(iv) iodate Cs2Ce(IO3)6: hydrothermal synthesis, crystal structures and thermal stability
Source: Royal Society of Chemistry journal article supplement (doi:10.1039/d4ce00722k), 2024-01-01
Supplement: d4ce00722k1.pdf [file d4ce00722k1.pdf]

## SUPPORTING INFORMATION

### Novel cesium cerium (IV) iodate $\text{Cs}_2\text{Ce}(\text{IO}_3)_6$ : hydrothermal synthesis, crystal structure and thermal stability

Oksana P. Grigorieva,<sup>1</sup> Larisa V. Shvanskaya,<sup>\*1</sup> Tatiana B. Shatalova<sup>1</sup>, Andrey A. Zolotarev,<sup>2</sup> Peter S. Berdonosov<sup>1</sup> and Valery A. Dolgikh<sup>1</sup>

<sup>1</sup>*M.V. Lomonosov Moscow State University, Leninskie Gory 1-3, Moscow 119991 Russia*

<sup>2</sup>*Institute of Earth Sciences, St. Petersburg State University, Universitetskaya Emb. 7/9, 199034 St. Petersburg, Russia*

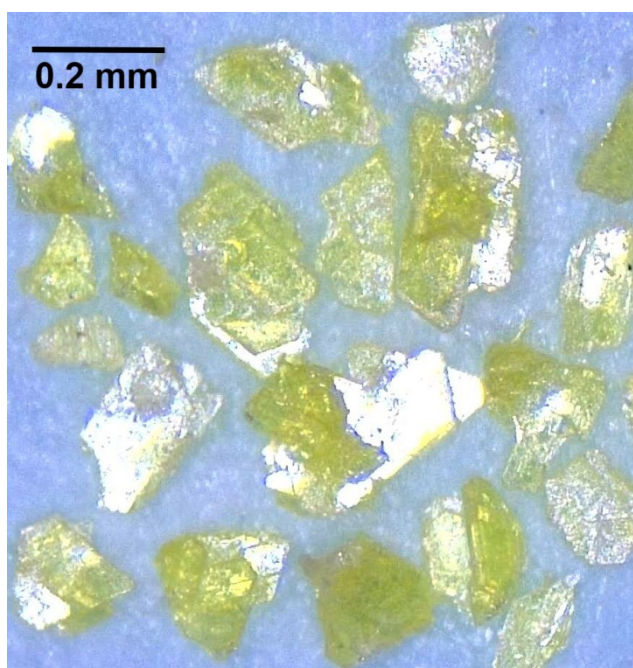

**Fig S1.** Photo of yellow  $\text{Cs}_2\text{Ce}(\text{IO}_3)_6$  crystals with a plate-like habit.

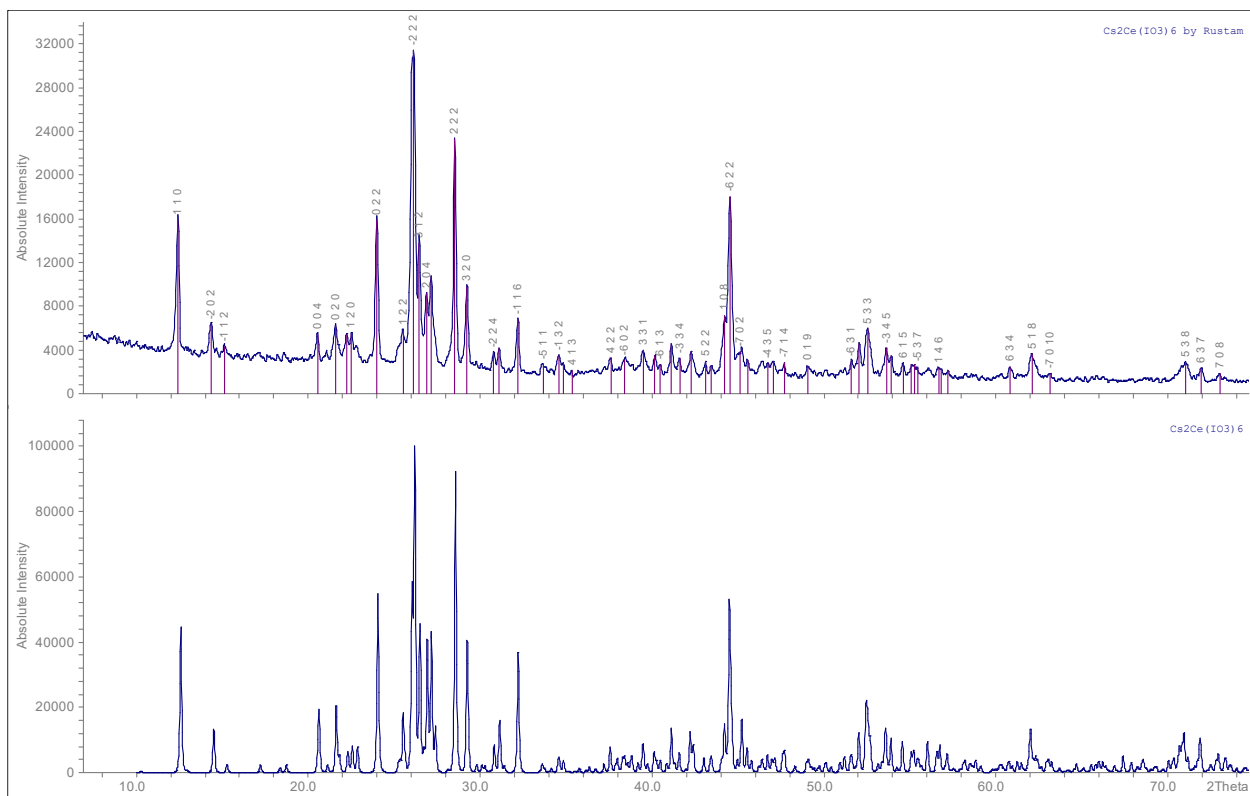

**Fig S2.** Comparison of PXR D pattern from experimental sample (upper part) and simulated one from single crystal data (low part) for  $\text{Cs}_2\text{Ce}(\text{IO}_3)_6$

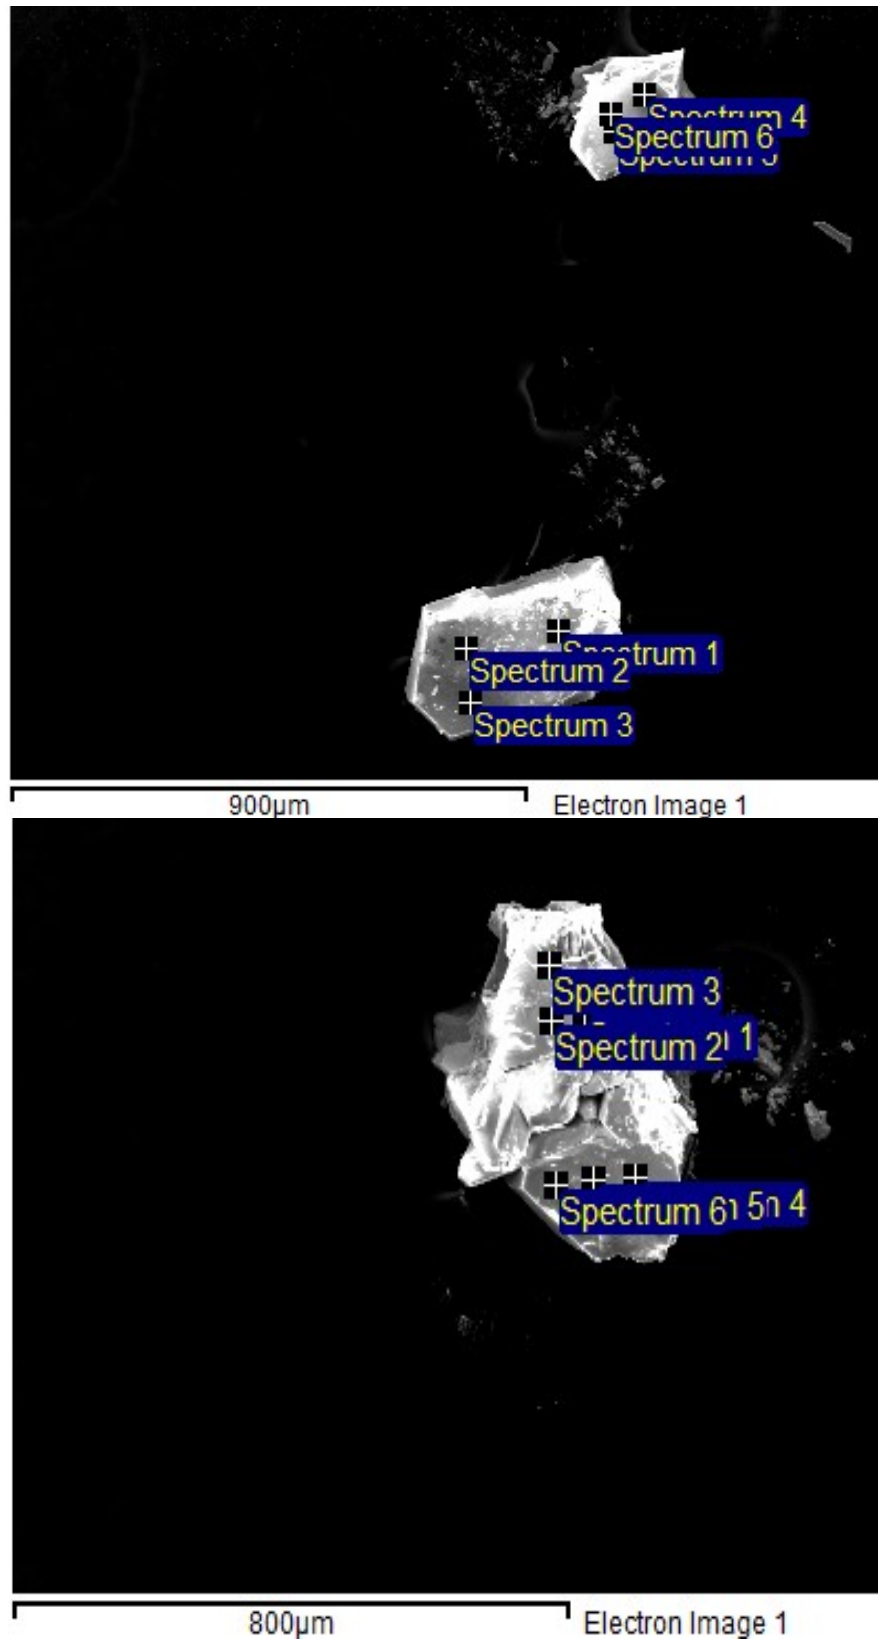

**Fig. S3.** SEM images of EDX analyzed crystal samples for  $\text{Cs}_2\text{Ce}(\text{IO}_3)_6$  upper -- sample I and lower -- sample II

**Table S1.** Results of EDX elemental analysis for Cs<sub>2</sub>Ce(IO<sub>3</sub>)<sub>6</sub> samples depicted in Fig S2

| Sample I       |           |       |       |       |      |
|----------------|-----------|-------|-------|-------|------|
| Spectrum       | In stats. | O     | I     | Cs    | Ce   |
| Spectrum 1     | Yes       | 58.44 | 28.48 | 8.23  | 4.86 |
| Spectrum 2     | Yes       | 59.92 | 27.39 | 8.24  | 4.45 |
| Spectrum 3     | Yes       | 54.95 | 30.73 | 9.23  | 5.09 |
| Spectrum 4     | Yes       | 58.91 | 28.27 | 8.00  | 4.82 |
| Spectrum 5     | Yes       | 60.53 | 27.58 | 7.67  | 4.23 |
| Spectrum 6     | Yes       | 56.83 | 29.78 | 8.37  | 5.02 |
| Mean           |           | 58.26 | 28.70 | 8.29  | 4.75 |
| Std. deviation |           | 2.07  | 1.31  | 0.52  | 0.34 |
| Max.           |           | 60.53 | 30.73 | 9.23  | 5.09 |
| Min.           |           | 54.95 | 27.39 | 7.67  | 4.23 |
| Sample II      |           |       |       |       |      |
| Spectrum 1     | Yes       | 58.20 | 28.63 | 8.30  | 4.88 |
| Spectrum 2     | Yes       | 60.30 | 27.45 | 7.68  | 4.57 |
| Spectrum 3     | Yes       | 54.55 | 31.48 | 8.91  | 5.05 |
| Spectrum 4     | Yes       | 47.10 | 36.31 | 10.49 | 6.10 |
| Spectrum 5     | Yes       | 51.80 | 32.73 | 9.50  | 5.97 |
| Spectrum 6     | Yes       | 58.87 | 28.56 | 8.04  | 4.54 |
| Mean           |           | 55.14 | 30.86 | 8.82  | 5.18 |
| Std. deviation |           | 5.02  | 3.33  | 1.04  | 0.69 |
| Max.           |           | 60.30 | 36.31 | 10.49 | 6.10 |
| Min.           |           | 47.10 | 27.45 | 7.68  | 4.54 |

All results in atomic%

**Table S2.** Bond valence data for Cs<sub>2</sub>Ce(IO<sub>3</sub>)<sub>6</sub> calculated according formula and parameters from <https://www.iucr.org/resources/data/datasets/bond-valence-parameters>

| atom | atom | R (bond length) | bv    | bvs          | atom        | atom   | R (bond length) | bv          | bvs |
|------|------|-----------------|-------|--------------|-------------|--------|-----------------|-------------|-----|
| I1   | O8   | 1.7818          | 1.818 |              | Cs          | O1     | 3.1707          | 0.130       |     |
|      | O1   | 1.8250          | 1.618 |              |             | O8     | 3.2740          | 0.099       |     |
|      | O5   | 1.8635          | 1.458 | <b>4.89*</b> |             | O4     | 3.2800          | 0.097       |     |
|      | O7   | 2.4208          | 0.323 | 5.22**       |             | O8     | 3.3030          | 0.091       |     |
| I2   | O4   | 1.7860          | 1.798 |              | O1          | 3.3406 | 0.082           |             |     |
|      | O7   | 1.8221          | 1.631 |              | O3          | 3.3741 | 0.075           |             |     |
|      | O3   | 1.8386          | 1.559 | <b>4.99*</b> | O3          | 3.4920 | 0.054           |             |     |
|      | O5   | 2.5203          | 0.247 | 5.24**       | O5          | 3.5124 | 0.052           |             |     |
| I3   | O6   | 1.8020          | 1.722 |              | O7          | 3.5570 | 0.046           |             |     |
|      | O9   | 1.8080          | 1.694 |              | O4          | 3.6100 | 0.040           |             |     |
|      | O2   | 1.8337          | 1.580 | <b>5.00</b>  | O9          | 3.6310 | 0.038           |             |     |
| Ce   | O2   | 2.2325          | x2    | 1.151        | O2          | 3.7070 | 0.031           | <b>0.84</b> |     |
|      | O3   | 2.3369          | x2    | 0.868        |             |        |                 |             |     |
|      | O5   | 2.3769          |       | 0.389        |             |        |                 |             |     |
|      | O5   | 2.3770          |       | 0.389        |             |        |                 |             |     |
|      | O1   | 2.4657          | x2    | 0.613        | <b>3.41</b> |        |                 |             |     |

\* Three nearest I-O distances are taken into account

\*\*Considering the elongated I-O distance, the distorted tetrahedra coordination of I atom
